# Supplementary material for: A SARS-CoV-2 variant of concern triggers Fc effector function with increased cross-reactivity
Source: bioRxiv or medRxiv preprint supplement (doi:10.1101/2021.11.05.21265853), 2021-11-05
Supplement: Supplementary file [file media-1.pdf]

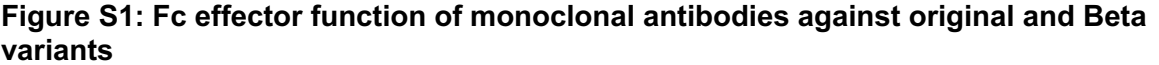

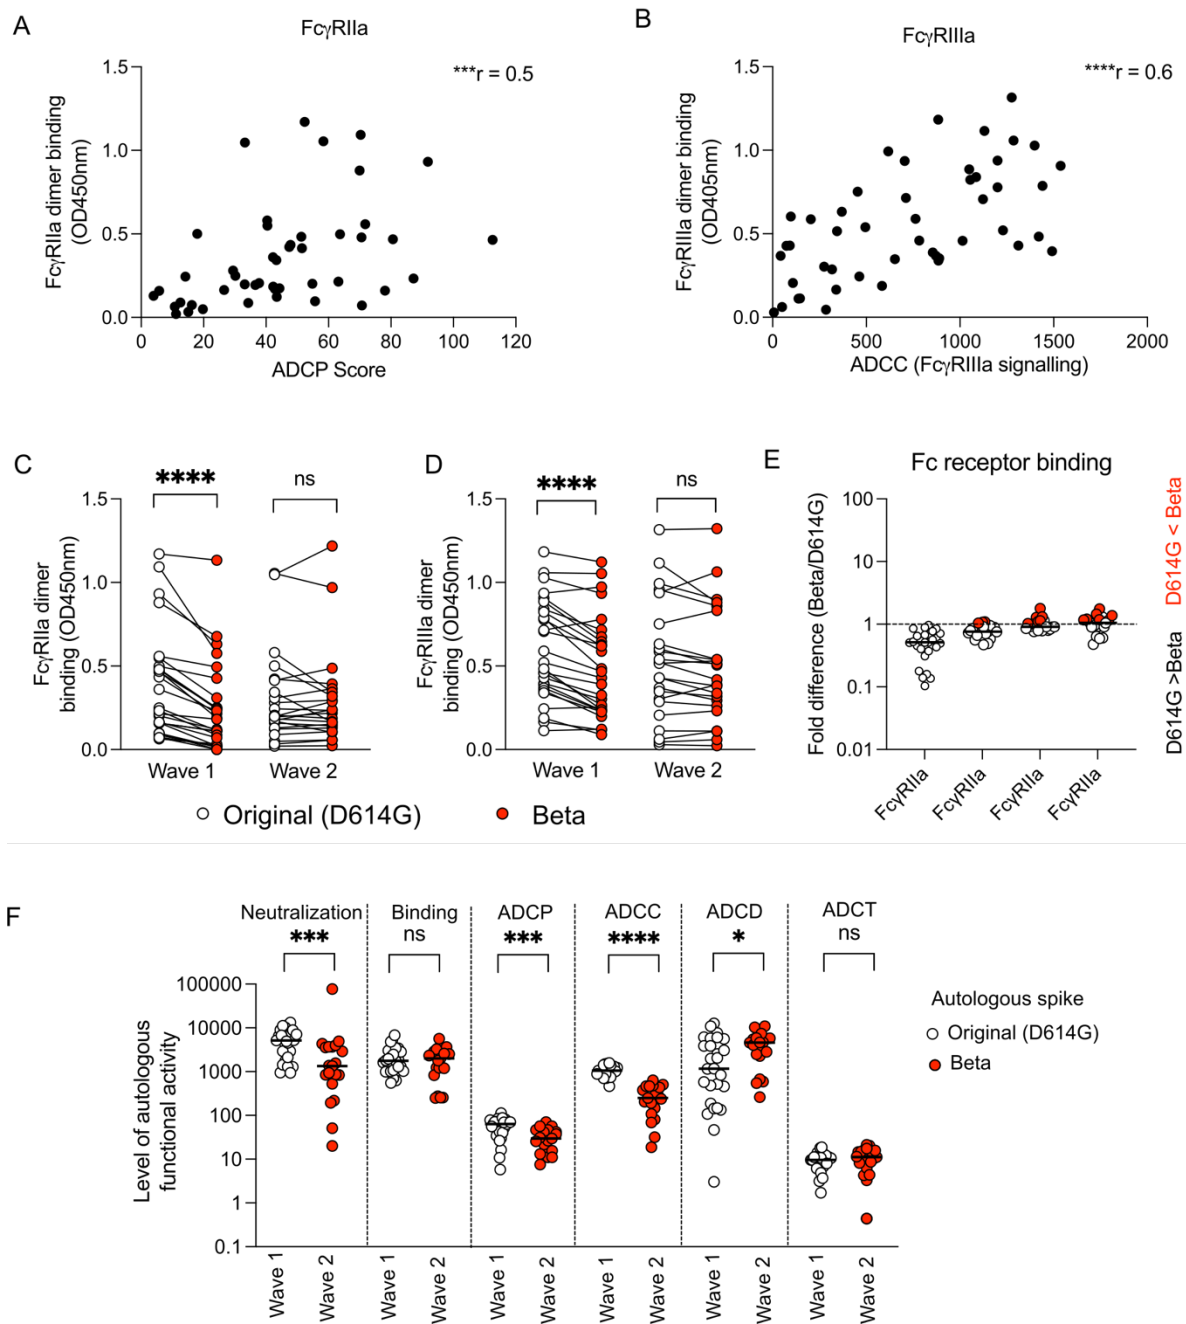

**Figure S2: Fc $\gamma$  receptor binding correlates with functional activity against SARS-CoV-2 variants**

**Table S1: Demographic and clinical description of the wave 1 and wave 2 cohorts**

| Patient ID | Wave | Gender | Age Range | Days from test to sample | Confirmed variant by sequence |
|------------|------|--------|-----------|--------------------------|-------------------------------|
| COV004     | 1    | Male   | 61-65     | 8                        |                               |
| COV005     | 1    | Male   | 36-40     | 15                       |                               |
| COV006     | 1    | Male   | 26-30     | 8                        |                               |
| COV020     | 1    | Male   | 51-55     | 10                       |                               |
| COV023     | 1    | Male   | 26-30     | 12                       |                               |
| COV024     | 1    | Male   | 66-70     | 7                        |                               |
| COV026     | 1    | Female | 56-60     | 14                       |                               |
| COV027     | 1    | Male   | 51-55     | 10                       |                               |
| COV028     | 1    | Female | 41-45     | 8                        |                               |
| COV030     | 1    | Male   | 41-45     | 10                       |                               |
| COV031     | 1    | Female | 41-45     | 17                       |                               |
| COV033     | 1    | Female | 46-50     | 11                       |                               |
| COV034     | 1    | Male   | 56-60     | 14                       |                               |
| COV036     | 1    | Male   | 41-45     | 9                        |                               |
| COV039     | 1    | Male   | 36-40     | 10                       |                               |
| COV040     | 1    | Male   | 41-45     | 10                       |                               |
| COV043     | 1    | Male   | 51-55     | 10                       |                               |
| COV044     | 1    | Male   | 46-50     | 10                       |                               |
| COV045     | 1    | Female | 60-65     | 8                        |                               |
| COV046     | 1    | Male   | 41-45     | 9                        |                               |
| COV048     | 1    | Male   | 70-75     | 9                        |                               |
| COV049     | 1    | Female | 51-55     | 23                       |                               |
| COV052     | 1    | Female | 56-60     | 12                       |                               |
| COV053     | 1    | Female | 61-65     | 13                       |                               |
| COV055     | 1    | Female | 51-55     | 33                       |                               |
| COV061     | 1    | Male   | 61-65     | 13                       |                               |
| COV076     | 1    | Male   | 71-75     | 7                        |                               |
| SA-01-0001 | 2    | Female | 26-30     | 12                       |                               |
| SA-01-0005 | 2    | Male   | 46-50     | 17                       |                               |
| SA-01-0006 | 2    | Female | 46-50     | 21                       |                               |
| SA-01-0007 | 2    | Female | 46-50     | 16                       |                               |
| SA-01-0011 | 2    | Female | 21-25     | 7                        |                               |
| SA-01-0017 | 2    | Female | 66-70     | 12                       |                               |
| SA-01-0018 | 2    | Male   | 61-65     | 29                       |                               |
| SA-01-0022 | 2    | Male   | 46-50     | 2                        |                               |
| SA-01-0028 | 2    | Male   | 66-70     | 20                       |                               |
| SA-01-0032 | 2    | Female | 61-65     | 14                       |                               |
| SA-01-0033 | 2    | Male   | 56-60     | 3                        |                               |
| SA-01-0034 | 2    | Male   | 41-45     | 6                        |                               |
| SA-01-0038 | 2    | Male   | 46-50     | 13                       |                               |
| SA-01-0042 | 2    | Female | 41-45     | 29                       |                               |
| SA-01-0061 | 2    | Male   | 56-60     | 25                       |                               |
| SA-01-0066 | 2    | Male   | 61-65     | 2                        |                               |
| SA-01-0068 | 2    | Male   | 31-35     | 20                       |                               |
| SA-01-0070 | 2    | Female | 66-70     | 8                        |                               |
| SA-01-0084 | 2    | Female | 55-60     | 2                        |                               |
| SA-01-0088 | 2    | Female | 71-75     | 15                       |                               |
| SA-01-0092 | 2    | Female | 66-70     | 11                       |                               |
